# Supplementary material for: AAV-Mediated Gene Delivery in Adult GM1-Gangliosidosis Mice Corrects Lysosomal Storage in CNS and Improves Survival
Source: PLoS One. 2010 Oct 18;5(10):e13468. doi: 10.1371/journal.pone.0013468 (PMC2956705; doi:10.1371/journal.pone.0013468)
Supplement: Table S5 — Brainstem+subcortical structures ganglioside distribution in adult GM1 mice, 4 months post AAV ic injection. (0.03 MB XLS) [file pone.0013468.s005.xls]

## Sheet: Table S5 - 4 months
Table S5: Brainstem + subcortical structures ganglioside distribution in adult GM1 mice, 4 months post AAV ic injection a
				GM1								GD3								GD1a								GT1a									GD1b							GT1b
Genotype	Treatment	Age b		Percent c			Concentration d					Percent c			Concentration d					Percent c			Concentration d					Percent c			Concentration d						Percent c			Concentration d				Percentc	Percent c			Concentration d
bgal +/-	-	180		30.7	+	0.9	103.9	+	7.7			1.4	+	0.5	4.4	+	1.2			12.8	+	2	43.6	+	8.2			3.3	+	0.3	11.4	+	11.4	+	1.9		13.0	+	0.5	43.9	+	4.1		24.2	24.2	+	0.7	82.5	+
bgal -/-	-	180		69.6	+	0.9#	505.3	+	12.4	#										4.9	+	0.1#	35.7	+	1.3			1.6	+	0.1#	11.5	+	11.5	+	0.7		6.2	+	0.1#	44.8	+	0.8		9.8	9.8	+	0.3#	70.9	+
bgal -/-	PBS	180		74.9	+	0.9#	554.8	+	18.1	#										4.9	+	0.8#	36.2	+	6.4			1.5	+	0.1#	11.1	+	11.1	+	0.8		5.6	+	0.2#	41.3	+	1.8		8.3	8.3	+	0.6#	61.6	+
bgal -/-	AAV-T	180		28.9	+	0.8*	82.3	+	6.8	*		1.5	+	0.1	4.4	+	0.4			13.2	+	0.9*	38.1	+	6.5			3.3	+	0.2*	9.4	+	9.4	+	1.1		11.4	+	0.4*	32.4	+	2.4		26.2	26.2	+	0.5*	74.8	+
bgal -/-	AAV-TC	180		22	+	0.1*	75.2	+	1.8	*		1.7	+	0.2	5.9	+	0.7			13.7	+	1.1*	46.8	+	4.3			3	+	0.2*	10.4	+	10.4	+	1		11.8	+	0.3*	40.2	+	2		24.7	24.7	+	1.3*	84.0	+
a Gangliosides identified according to the nomenclature system of Svennerholm. Values represent the mean + SEM. N = 3 per group
b Age of mice at time of analysis in days.
c Determined from densitometric scanning of HPTLC plates.
d Concentration expressed as mg sialic acid/100 mg dry weight.
* Indicates that the value is significantly different from that of the untreated bgal -/- mice at P < 0.01.
# Indicates that the value is significantly different from that of the untreated bgal +/- mice at P < 0.01.
[truncated: 7 more columns]
