# Supplementary material for: AAV-Mediated Gene Delivery in Adult GM1-Gangliosidosis Mice Corrects Lysosomal Storage in CNS and Improves Survival
Source: PLoS One. 2010 Oct 18;5(10):e13468. doi: 10.1371/journal.pone.0013468 (PMC2956705; doi:10.1371/journal.pone.0013468)
Supplement: Table S6 — Cerebellar ganglioside distribution in adult GM1 mice, 1 month post AAV ic injection. (0.03 MB XLS) [file pone.0013468.s006.xls]

## Sheet: Table S6 - 1 month
Table S6: Cerebellar ganglioside distribution in adult GM1 mice, 1 month post AAV ic injection a
				GM3								GM2								GM1								GD3										GD1a								GT1a
Genotype	Treatment	Age b		Percent c			Concentration d					Percent c			Concentration d					Percent c			Concentration d					Percent c			Concentrationd		Concentration d					Percent c			Concentration d					Percent c			Concentration d
bgal -/-	-	60																		54.9	+	0.5	267.1	+	10.6			0.6	+	0.1	39.8	39.8	2.9	+	0.1			9	+	0.2	43.9	+	1.1			5.1	+	0.1	24.8
bgal +/-	-	90																		6.6	+	0.7	19.4	+	3.8			3	+	0.5	39.8	39.8	8.5	+	0.6			12.9	+	0.7	37.6	+	4.7			7.5	+	0.1	21.8
bgal -/-	-	90																		65.1	+	3.1#	341.4	+	33.1	#		0.44	+	0.1#			2.3	+	0.4	#		5.4	+	0.3#	28.3	+	3.9			3.4	+	0.3#	18.2
bgal -/-	PBS	90																		63.3	+	1.9#	341.1	+	44	#		0.4	+	0.1#			2.3	+	0.2	#		5.6	+	0.5#	29.8	+	4.8			4	+	0.2#	21.4
bgal -/-	AAV-T	90		1.2	+	0.6	3.7	+	1.9			0.7	+	0.4	2.1	+	1.1			42.6	+	2.0*	150.5	+	19.3	*		1.2	+	0.2			4.0	+	0.7			7.8	+	0.1*	27.2	+	2.3			5.4	+	0.4*	19.0
bgal -/-	AAV-TC	90		1.5	+	0.2	4.7	+	0.8			1	+	0.5	3.2	+	1.8			11	+	0.6*	35	+	3.2	*		2.1	+	0.5*			6.7	+	1.6	*		10.8	+	0.4*	34.6	+	2.5			7.9	+	0.5*	25.1
a Gangliosides identified according to the nomenclature system of Svennerholm. Values represent the mean + SEM. N = 3 per group
b Age of mice at time of analysis in days.
c Determined from densitometric scanning of HPTLC plates.
d Concentration expressed as mg sialic acid/100 mg dry weight.
* Indicates that the value is significantly different from that of the untreated bgal -/- mice at P < 0.01.
# Indicates that the value is significantly different from that of the untreated bgal +/- mice at P < 0.01.
[truncated: 23 more columns]
