# Supplementary material for: AAV-Mediated Gene Delivery in Adult GM1-Gangliosidosis Mice Corrects Lysosomal Storage in CNS and Improves Survival
Source: PLoS One. 2010 Oct 18;5(10):e13468. doi: 10.1371/journal.pone.0013468 (PMC2956705; doi:10.1371/journal.pone.0013468)
Supplement: Table S7 — Cerebellar ganglioside distribution in adult GM1 mice, 4 month post AAV ic injection. (0.03 MB XLS) [file pone.0013468.s007.xls]

## Sheet: Table S7 - 4 months
Table S7: Cerebellar ganglioside distribution in adult GM1 mice, 4 month post AAV ic injection a
				GM1								GD3								GD1a								GT1a										GD1b							GT1b
Genotype	Treatment	Age b		Percent c			Concentration d					Percent c			Concentration d					Percent c			Concentration d					Percent c			Concentration d							Percent c			Concentration d					Percent c			Concentration d
bgal +/-	-	180		9.2	+	1.2	22.7	+	1.9			2.1	+	0.3	5.3	+	0.7			13.8	+	0.4	34.5	+	2.7			8.1	+	0.5	20.1	+	20.1	+	1.2			8.2	+	0.6	20.2	+	1.4		37.7	+	1.8	94.7	+
bgal -/-	-	180		61.1	+	0.8#	405.4	+	8.8	#		0.3	+	0.1#	1.7	+	0.2			6.2	+	0.2#	41.4	+	1.7			4.3	+	0.2#	28.6	+	28.6	+	1.1			5.3	+	0.1#	35.2	+	0.5#		14.4	+	0.4#	95.7	+
bgal -/-	PBS	180		62.9	+	0.3#	396.3	+	23.3	#		0.3	+	0.1#	1.7	+	0.1			5.8	+	0.4#	36.5	+	4.6			4	+	0.1#	25.4	+	25.4	+	2.3			5.1	+	0.4#	32.4	+	3.9		13.8	+	0.3#	86.4	+
bgal -/-	AAV-T	180		24.6	+	8.1*	79.6	+	27.2	*	1.2	1.2	+	0.4	3.9	+	1.2			10.8	+	0.4*	34.5	+	2			7.4	+	0.5*	23.3	+	23.3	+	0.9			7.2	+	0.3*	22.7	+	1.1*		32.2	+	4.5*	101.7	+
bgal -/-	AAV-TC	180		9.1	+	0.7*	22.1	+	0.2	*		2.6	+	0.3*	6.3	+	0.9			13.9	+	0.8*	34.4	+	3.7	*		7.8	+	0.9*	19.4	+	19.4	+	3.4			6.8	+	0.7	16.7	+	2.6*		38.3	+	2.3*	94.5	+
a Gangliosides identified according to the nomenclature system of Svennerholm. Values represent the mean + SEM. N = 3 per group
b Age of mice at time of analysis in days.
c Determined from densitometric scanning of HPTLC plates.
d Concentration expressed as mg sialic acid/100 mg dry weight.
* Indicates that the value is significantly different from that of the untreated bgal -/- mice at P < 0.01.
# Indicates that the value is significantly different from that of the untreated bgal +/- mice at P < 0.01.
[truncated: 10 more columns]
