# Supplementary material for: AAV-Mediated Gene Delivery in Adult GM1-Gangliosidosis Mice Corrects Lysosomal Storage in CNS and Improves Survival
Source: PLoS One. 2010 Oct 18;5(10):e13468. doi: 10.1371/journal.pone.0013468 (PMC2956705; doi:10.1371/journal.pone.0013468)
Supplement: Table S9 — Spinal Cord ganglioside distribution in adult GM1 mice, 1 month post AAV in injection. (0.03 MB XLS) [file pone.0013468.s009.xls]

## Sheet: Table S9 - 1 month
Table S9: Spinal Cord ganglioside distribution in adult GM1 mice, 1 month post AAV in injection a
				GM3								GM2								GM1								GD3										GD1a								GT1a
Genotype	Treatment	Age b		Percent c			Concentration d					Percent c			Concentration d					Percent c			Concentration d					Percent c			Concentrationd		Concentration d					Percent c			Concentration d					Percent c			Concentration d
bgal -/-	-	60																		47.1	+	0.5	122.2	+	8.3													8.4	+	0.5	21.9	+	2			3	+	0.2	7.8
bgal +/-	-	90																		17.6	+	2.3	31.9	+	2.9													11.4	+	1	22.0	+	5.7			3.4	+	0.2	6.4
bgal -/-	-	90																		59.2	+	1.9#	139.6	+	22.3	#												6.5	+	0.3#	15.6	+	3.2			2.3	+	0.1#	5.6
bgal -/-	PBS	90																		55.9	+	3.8#	146.3	+	6.2	#												6.6	+	0.4#	17.5	+	1.6			2.4	+	0.2#	6.5
bgal -/-	AAV-T	90		2.2	+	0.6	4.4	+	1			1.2	+	0.2	2.4	+	0.3			45.8	+	2.6*	95.5	+	10	*		0.9	+	0.1			1.8	+	0.3			8.1	+	0.6	16.7	+	0.9			2.5	+	0.3	5.2
bgal -/-	AAV-TC	90		2.3	+	0.1	5	+	0.1			1.2	+	0.5	2.6	+	1.3			35.7	+	3.7*	78.1	+	13.2	*		0.8	+	0.1			1.7	+	0.1			9.4	+	0.5	20.3	+	0.2			3.3	+	0.1	7.1
a Gangliosides identified according to the nomenclature system of Svennerholm. Values represent the mean + SEM. N = 3 per group
b Age of mice at time of analysis in days.
c Determined from densitometric scanning of HPTLC plates.
d Concentration expressed as mg sialic acid/100 mg dry weight.
* Indicates that the value is significantly different from that of the untreated bgal -/- mice at P < 0.01.
# Indicates that the value is significantly different from that of the untreated bgal +/- mice at P < 0.01.
[truncated: 22 more columns]
