# Supplementary material for: AAV-Mediated Gene Delivery in Adult GM1-Gangliosidosis Mice Corrects Lysosomal Storage in CNS and Improves Survival
Source: PLoS One. 2010 Oct 18;5(10):e13468. doi: 10.1371/journal.pone.0013468 (PMC2956705; doi:10.1371/journal.pone.0013468)
Supplement: Table S11 — Spinal Cord ganglioside distribution in adult GM1 mice, at endpoing or 10 month post AAV ic injection. (0.03 MB XLS) [file pone.0013468.s011.xls]

## Sheet: Table S11 - Endpoint
Table S11: Spinal Cord ganglioside distribution in adult GM1 mice, at endpoing or 10 month post AAV ic injection a
				GM1								GD1a								GT1a									GD1b												GT1b
Genotype	Treatment	Age b		Percent c			Concentration d					Percent c			Concentration d					Percent c			Concentration d						Percent c						Concentration d						Percent c					Concentration d
bgal +/-	-	360		25.19	+	3.27	37.68	+	2.97			9.28	+	0.48	14.0	+	0.21			2.47	+	0.27	3.77	+	0.6	+	0.2		10.2	+	0.3	18.9	0.24		15.43	+	1.15				28.47	+	1.92			43.48	+	5.33
bgal -/-	-	210-240		68.04	+	1.69	269.44	+	37.62	#		7.55	+	0.67	29.2	+	1.29			1.48	+	0.1	5.41	+	0.6	+			5.1	+	0.2#	25.2	0.1		19.99	+	2.3				9.37	+	0.18			36.9	+	4.2
bgal -/-	AAV-T	HEP		56.71	+	6.26	136.26	+	27.34	*		8.78	+	0.55	20.8	+	2.57			1.83	+	0.27	4.24	+	0.4	+	0.42		6.01	+	0.51	14.35	0.51		14.35	+	2.22				14.73	+	3			35.32	+	7.99
bgal -/-	AAV-TC	360		45.99	+	2.1	117.84	+	16.4	*		9.55	+	0.55	24	+	1.31			1.92	+	0.07	4.88	+	0.5	+	0.5		7.56	+	0.22	19.11	0.22		19.11	+	1.59				18.42	+	1.16			46.32	+	3.24
a Gangliosides identified according to the nomenclature system of Svennerholm. Values represent the mean + SEM. N = 3 per group
b Age of mice at time of analysis in days.
c Determined from densitometric scanning of HPTLC plates.
d Concentration expressed as mg sialic acid/100 mg dry weight.
* Indicates that the value is significantly different from that of the untreated bgal -/- mice at P < 0.01.
# Indicates that the value is significantly different from that of the untreated bgal +/- mice at P < 0.01.
HEP - Humane endpoint defined by > 20% loss in body weight.
